# Supplementary material for: Head-to-Head Comparison of BRAF/MEK Inhibitor Combinations Proposes Superiority of Encorafenib Plus Trametinib in Melanoma
Source: MDPI journal article supplement (doi:10.3390/cancers14194930), 2022-10-08
Supplement: s1 [file s1]

## Supplemental Material

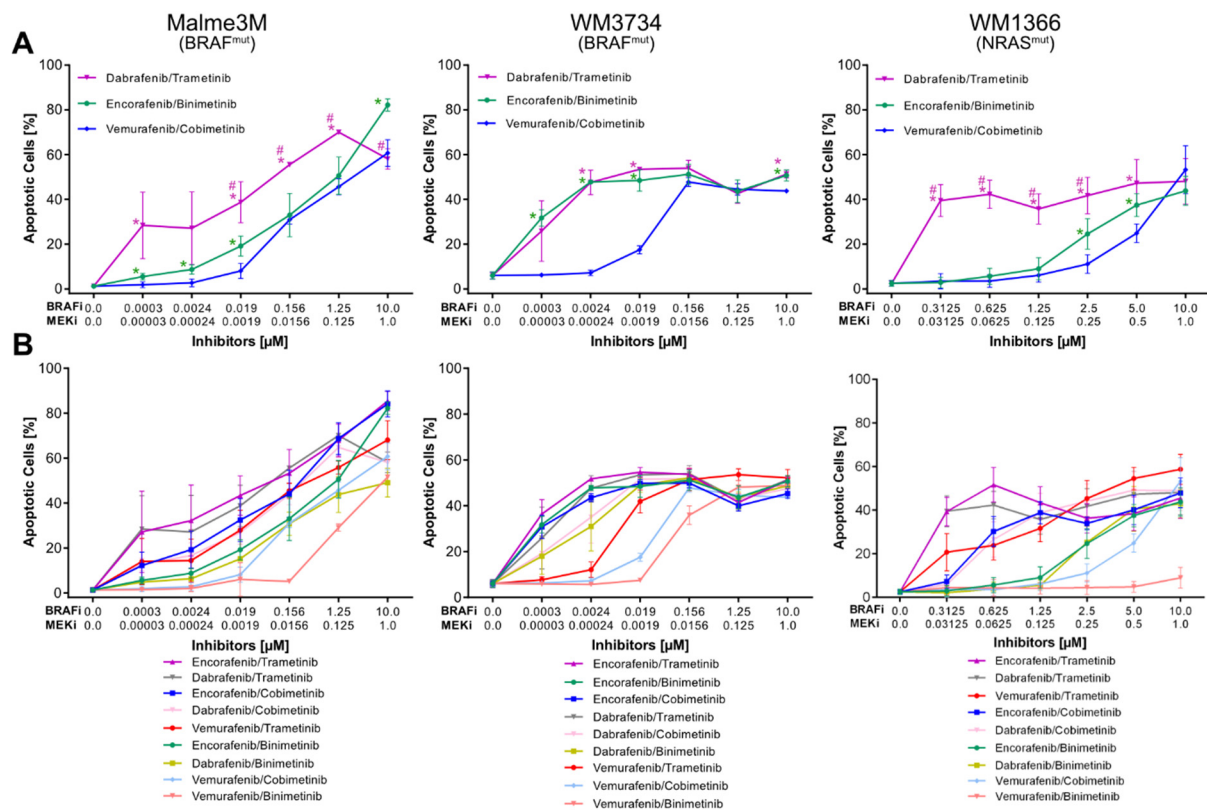

**Figure S1:** Encorafenib/trametinib represents the most efficient unconventional and dabrafenib/trametinib the best clinically approved inhibitor combination in BRAF<sup>mut</sup> and NRAS<sup>mut</sup> melanoma cells. Sub-G1 (apoptosis) of two BRAF<sup>mut</sup> cell lines (Malme3M and WM3734) and one NRAS<sup>mut</sup> cell line (WM1366) after treatment for 72 hours using different BRAFi/MEKi combinations with increasing concentrations of inhibitors (BRAF<sup>mut</sup> 1:8 serial dilutions, NRAS<sup>mut</sup> 1:2 serial dilutions).  $n \geq 3$ , error bars indicate standard deviation. (A) Panel compares approved inhibitor combinations for BRAF<sup>mut</sup> melanoma, \* indicates significantly different values relative to vemurafenib/cobimetinib, # labels data points significantly different relative to encorafenib/binimetinib. Significance defined as  $p < 0.05$  based on two-tailed non-paired T-test. Table S3 shows complete list of p-values for all data points. (B) Panel summarizes all tested inhibitor combinations. Significances not shown.

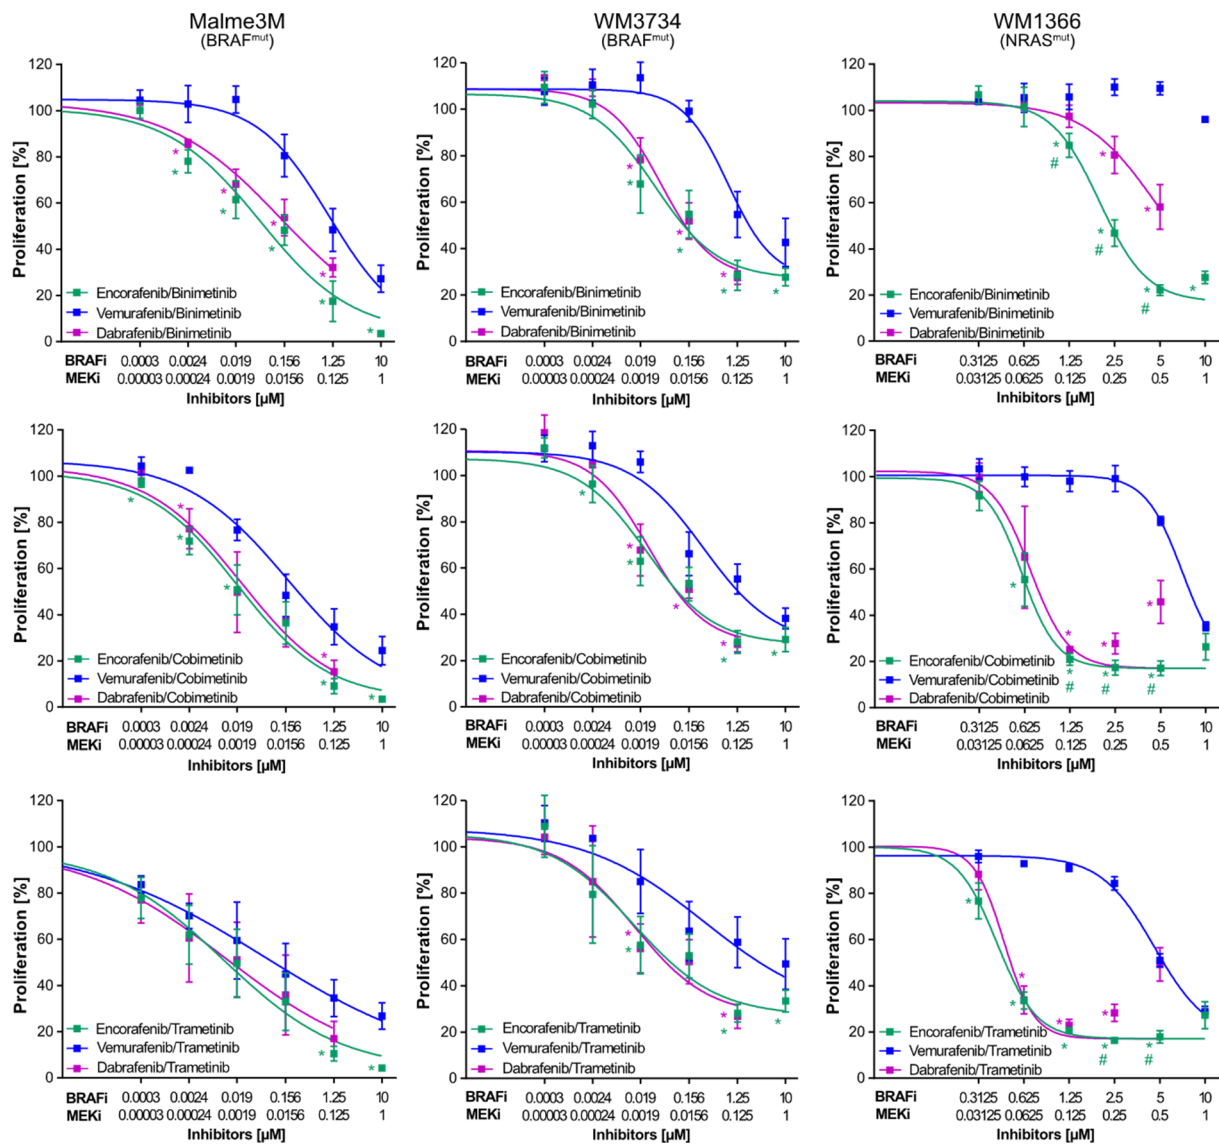

**Figure S2:** IC<sub>50</sub> curves modeled from MUH proliferation data displaying differences for BRAFi.  $n \geq 3$ , error bars indicate standard deviation, \* indicates significantly different values relative to vemurafenib, # labels data points significantly different relative to dabrafenib. Significance defined as  $p < 0.05$  based on two-tailed non-paired T-test. Table S5 shows a complete list of p-values for all data points.

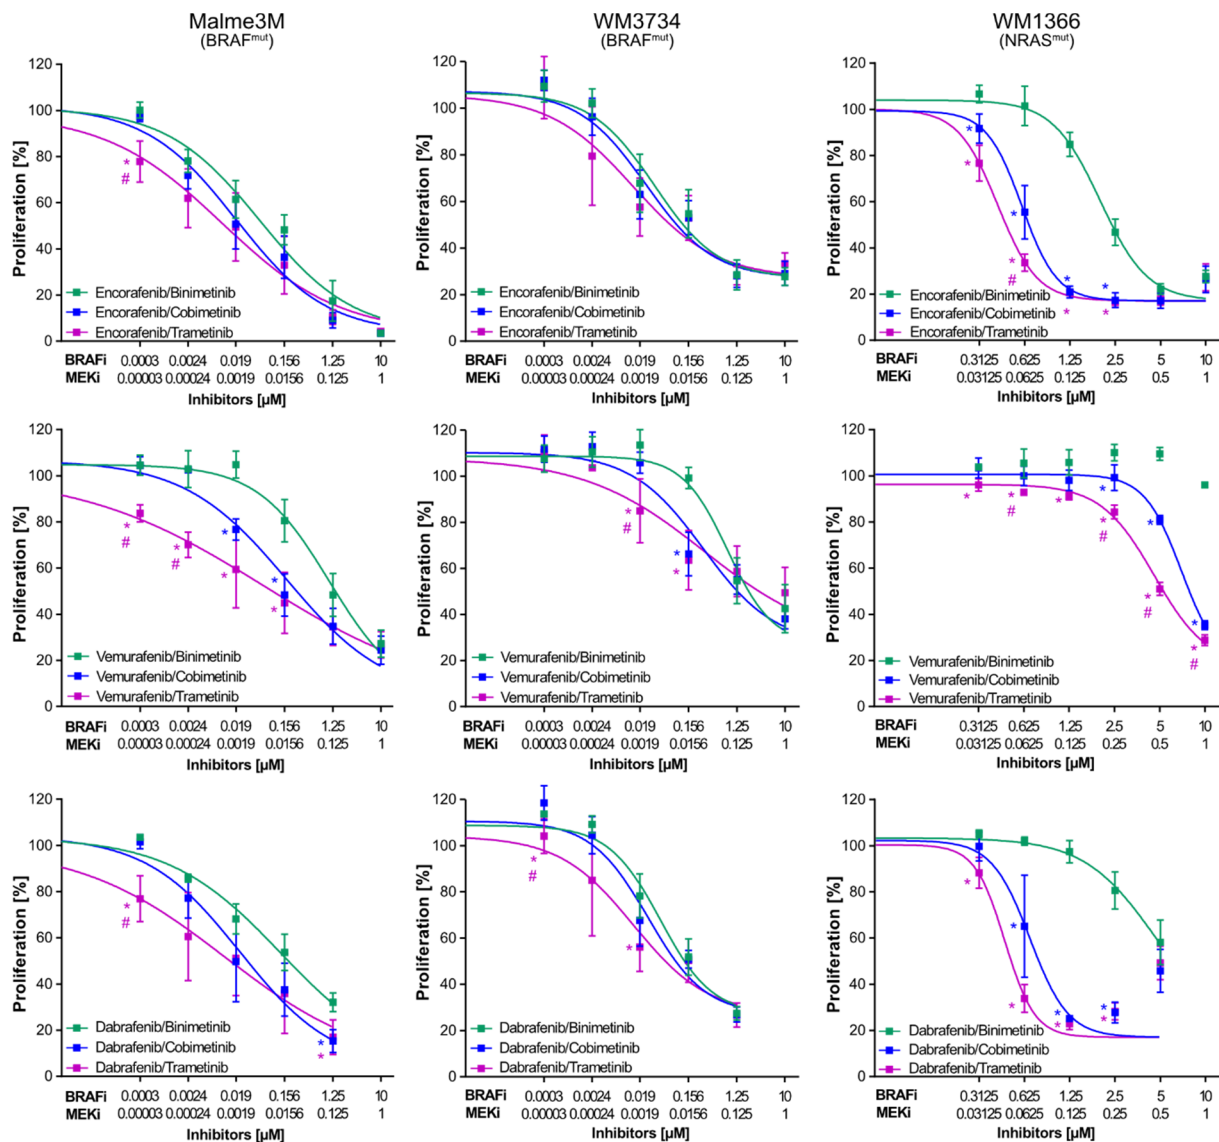

**Figure S3:** IC<sub>50</sub> curves modeled from MUH proliferation data displaying differences for MEKi.  $n \geq 3$ , error bars indicate standard deviation, \* indicates significantly different values relative to vemurafenib, # labels data points significantly different relative to dabrafenib. Significance defined as  $p < 0.05$  based on two-tailed non-paired T-test. Table S6 shows a complete list of p-values for all data points.

**Table S1:** List of p-values from subG1 analysis, related to Figure 1.

| Malme3M (BRAF <sup>mut</sup> ) |                |                |                |                |                |                |                |                |                |
|--------------------------------|----------------|----------------|----------------|----------------|----------------|----------------|----------------|----------------|----------------|
| BRAFi/MEKi<br>[μM]             | EB/VB          | EB/DB          | VB/DB          | EC/VC          | EC/DC          | VC/DC          | ET/VT          | ET/DT          | VT/DT          |
| 0.0003/0.00003                 | <b>0.00926</b> | 0.50751        | <b>0.00792</b> | <b>0.04350</b> | 0.90822        | <b>0.00362</b> | 0.33336        | 0.92797        | 0.23650        |
| 0.0024/0.00024                 | <b>0.00996</b> | 0.12183        | <b>0.00708</b> | <b>0.02716</b> | 0.67199        | <b>0.01557</b> | 0.17214        | 0.72018        | 0.30830        |
| 0.019/0.0019                   | 0.05842        | 0.20106        | 0.10122        | <b>0.01425</b> | 0.42710        | <b>0.00639</b> | 0.10195        | 0.57198        | 0.21777        |
| 0.156/0.0156                   | <b>0.00774</b> | 0.73956        | <b>0.00103</b> | 0.10076        | 0.97737        | <b>0.01099</b> | 0.28965        | 0.73124        | <b>0.00756</b> |
| 1.25/0.125                     | <b>0.01170</b> | 0.36204        | <b>0.03493</b> | <b>0.00759</b> | 0.46498        | <b>0.00498</b> | 0.05507        | 0.64993        | <b>0.00133</b> |
| 10/1                           | <b>0.00004</b> | <b>0.00117</b> | 0.53419        | <b>0.00816</b> | <b>0.01218</b> | 0.67732        | <b>0.03543</b> | <b>0.00172</b> | 0.15356        |
| WM3734 (BRAF <sup>mut</sup> )  |                |                |                |                |                |                |                |                |                |
| BRAFi/MEKi<br>[μM]             | EB/VB          | EB/DB          | VB/DB          | EC/VC          | EC/DC          | VC/DC          | ET/VT          | ET/DT          | VT/DT          |
| 0.0003/0.00003                 | <b>0.00029</b> | 0.05337        | 0.05807        | <b>0.00115</b> | 0.19782        | 0.13304        | <b>0.00151</b> | 0.29019        | 0.08136        |
| 0.0024/0.00024                 | <b>0.00000</b> | 0.05399        | <b>0.01496</b> | <b>0.00001</b> | 0.26774        | <b>0.01339</b> | <b>0.00004</b> | 0.26745        | <b>0.00068</b> |
| 0.019/0.0019                   | <b>0.00012</b> | 0.89402        | <b>0.00002</b> | <b>0.00002</b> | 0.33596        | <b>0.00004</b> | <b>0.01561</b> | 0.40526        | <b>0.01722</b> |
| 0.156/0.0156                   | <b>0.01223</b> | 0.74520        | <b>0.00311</b> | 0.28001        | 0.56392        | 0.26384        | 0.50961        | 0.90949        | 0.49747        |
| 1.25/0.125                     | 0.24995        | 0.97658        | 0.09721        | 0.08291        | 0.15193        | 0.50204        | <b>0.00478</b> | 0.71378        | <b>0.01994</b> |
| 10/1                           | 0.51134        | 0.24367        | 0.95457        | 0.30740        | 0.30355        | 0.06184        | 0.68383        | 0.84418        | 0.77401        |
| WM1366 (NRAS <sup>mut</sup> )  |                |                |                |                |                |                |                |                |                |
| BRAFi/MEKi<br>[μM]             | EB/VB          | EB/DB          | VB/DB          | EC/VC          | EC/DC          | VC/DC          | ET/VT          | ET/DT          | VT/DT          |
| 0.3125/0.03125                 | 0.48307        | 0.61299        | 0.26616        | 0.14906        | 0.47553        | 0.28519        | <b>0.01365</b> | 0.96846        | <b>0.01501</b> |
| 0.625/0.0625                   | 0.62789        | 0.46298        | 0.83763        | <b>0.00038</b> | 0.51007        | <b>0.00175</b> | <b>0.00179</b> | 0.11670        | <b>0.00719</b> |
| 1.25/0.125                     | 0.13613        | 0.23894        | 0.50098        | <b>0.00003</b> | 0.99626        | <b>0.00044</b> | 0.05027        | 0.17498        | 0.40851        |
| 2.5/0.25                       | <b>0.00177</b> | 0.90909        | <b>0.00213</b> | <b>0.00011</b> | <b>0.04996</b> | <b>0.00031</b> | 0.14343        | 0.34469        | 0.56205        |
| 5/0.5                          | <b>0.00003</b> | 0.61931        | <b>0.00053</b> | <b>0.00867</b> | 0.14892        | <b>0.00222</b> | <b>0.01339</b> | 0.22404        | 0.26091        |
| 10/1                           | <b>0.00013</b> | 0.84124        | <b>0.00014</b> | 0.42749        | 0.84743        | 0.56873        | 0.06183        | 0.71664        | 0.13577        |

E...encorafenib; V...vemurafenib; D...dabrafenib; B...binimetinib; C...cobimetinib; T...trametinib; bold numbers indicate significant values with p<0.05 as determined by two-tailed non-paired T-test.

**Table S2:** List of p-values from subG1 analysis, related to Figure 2.

| Malme3M (BRAF <sup>mut</sup> ) |                |                |                |                |                |                |                |                |                |
|--------------------------------|----------------|----------------|----------------|----------------|----------------|----------------|----------------|----------------|----------------|
| BRAFi/MEKi<br>[μM]             | EB/EC          | EB/ET          | EC/ET          | VB/VC          | VB/VT          | VC/VT          | DB/DC          | DB/DT          | DC/DT          |
| 0.0003/0.00003                 | 0.13393        | 0.10823        | 0.24608        | 0.56391        | 0.10224        | 0.11435        | <b>0.00993</b> | 0.05117        | 0.14475        |
| 0.0024/0.00024                 | 0.09811        | 0.06342        | 0.27715        | 0.60258        | 0.09217        | 0.10817        | <b>0.03495</b> | 0.09032        | 0.34912        |
| 0.019/0.0019                   | 0.09649        | <b>0.01367</b> | 0.22261        | 0.68431        | <b>0.03099</b> | <b>0.02283</b> | <b>0.01850</b> | <b>0.01148</b> | 0.12348        |
| 0.156/0.0156                   | 0.25303        | 0.07165        | 0.34600        | <b>0.00002</b> | <b>0.00003</b> | <b>0.00289</b> | <b>0.03055</b> | <b>0.00123</b> | <b>0.01289</b> |
| 1.25/0.125                     | <b>0.04594</b> | 0.05294        | 0.90242        | <b>0.00193</b> | <b>0.00016</b> | <b>0.01943</b> | <b>0.01694</b> | <b>0.00477</b> | 0.12677        |
| 10/1                           | 0.62594        | 0.34050        | 0.78321        | 0.05494        | <b>0.02942</b> | 0.29196        | 0.22047        | 0.11662        | 0.98670        |
| WM3734 (BRAF <sup>mut</sup> )  |                |                |                |                |                |                |                |                |                |
| BRAFi/MEKi<br>[μM]             | EB/EC          | EB/ET          | EC/ET          | VB/VC          | VB/VT          | VC/VT          | DB/DC          | DB/DT          | DC/DT          |
| 0.0003/0.00003                 | 0.80307        | 0.33424        | 0.29694        | 0.51316        | 0.09424        | 0.16057        | 0.88814        | 0.43371        | 0.55842        |
| 0.0024/0.00024                 | <b>0.02353</b> | <b>0.01095</b> | <b>0.00217</b> | 0.11515        | <b>0.03106</b> | 0.07854        | 0.67705        | 0.07498        | 0.15781        |
| 0.019/0.0019                   | 0.69042        | 0.11063        | <b>0.03500</b> | <b>0.00066</b> | <b>0.00030</b> | <b>0.00141</b> | 0.29951        | 0.06642        | 0.24514        |
| 0.156/0.0156                   | 0.66666        | 0.45381        | 0.11214        | <b>0.01059</b> | <b>0.01330</b> | 0.29782        | 0.91802        | 0.46549        | 0.57790        |
| 1.25/0.125                     | 0.30807        | 0.53416        | 0.50663        | 0.17565        | 0.06851        | <b>0.01232</b> | 0.82298        | 0.75291        | 0.85798        |
| 10/1                           | <b>0.04460</b> | 0.81549        | <b>0.01538</b> | 0.08502        | 0.34559        | <b>0.01959</b> | 0.41249        | 0.07043        | 0.08010        |
| WM1366 (NRAS <sup>mut</sup> )  |                |                |                |                |                |                |                |                |                |
| BRAFi/MEKi<br>[μM]             | EB/EC          | EB/ET          | EC/ET          | VB/VC          | VB/VT          | VC/VT          | DB/DC          | DB/DT          | DC/DT          |
| 0.3125/0.03125                 | 0.06662        | <b>0.00005</b> | <b>0.00011</b> | 0.69475        | <b>0.01225</b> | <b>0.00967</b> | <b>0.04172</b> | <b>0.00006</b> | <b>0.00010</b> |
| 0.625/0.0625                   | <b>0.00073</b> | <b>0.00004</b> | <b>0.00661</b> | 0.74687        | <b>0.00240</b> | <b>0.00148</b> | <b>0.00197</b> | <b>0.00004</b> | <b>0.02175</b> |
| 1.25/0.125                     | <b>0.00016</b> | <b>0.00024</b> | 0.34235        | 0.38142        | <b>0.00019</b> | <b>0.00032</b> | <b>0.00035</b> | <b>0.00015</b> | 0.59852        |
| 2.5/0.25                       | <b>0.04686</b> | 0.05199        | 0.54440        | <b>0.04445</b> | <b>0.00009</b> | <b>0.00032</b> | <b>0.01270</b> | <b>0.02427</b> | 0.68364        |
| 5/0.5                          | 0.55919        | 0.85258        | 0.74865        | <b>0.00017</b> | <b>0.00000</b> | <b>0.00011</b> | 0.24622        | 0.39733        | 0.78858        |
| 10/1                           | 0.42509        | 0.78017        | 0.69431        | <b>0.00028</b> | <b>0.00002</b> | 0.42301        | 0.31539        | 0.41892        | 0.90006        |

E...encorafenib; V...vemurafenib; D...dabrafenib; B...binimetinib; C...cobimetinib; T...trametinib; bold numbers indicate significant values with p<0.05 as determined by two-tailed non-paired T-test.

**Table S3:** List of p-values from subG1 analysis, related to Figure S1A.

| Malme3M (BRAF <sup>mut</sup> ) |                |                |                | WM3734 (BRAF <sup>mut</sup> ) |         |                | WM1366 (NRAS <sup>mut</sup> ) |                |         |                |
|--------------------------------|----------------|----------------|----------------|-------------------------------|---------|----------------|-------------------------------|----------------|---------|----------------|
| BRAFi/MEKi<br>[μM]             | EB/VB          | EB/DB          | VB/DB          | EB/VB                         | EB/DB   | VB/DB          | BRAFi/MEKi<br>[μM]            | EB/VB          | EB/DB   | VB/DB          |
| 0.0003/0.00003                 | <b>0.03246</b> | 0.05644        | <b>0.03679</b> | <b>0.00030</b>                | 0.50912 | 0.06629        | 0.3125/0.03125                | 0.48307        | 0.61299 | 0.26616        |
| 0.0024/0.00024                 | <b>0.01939</b> | 0.12323        | 0.06077        | <b>0.00000</b>                | 0.96149 | <b>0.00024</b> | 0.625/0.0625                  | 0.62789        | 0.46298 | 0.83763        |
| 0.019/0.0019                   | <b>0.02677</b> | <b>0.02979</b> | <b>0.00562</b> | <b>0.00047</b>                | 0.14939 | <b>0.00001</b> | 1.25/0.125                    | 0.13613        | 0.23894 | 0.50098        |
| 0.156/0.0156                   | 0.73636        | <b>0.01638</b> | <b>0.00004</b> | 0.29814                       | 0.44901 | 0.05649        | 2.5/0.25                      | <b>0.00177</b> | 0.90909 | <b>0.00213</b> |
| 1.25/0.125                     | 0.40243        | <b>0.01598</b> | <b>0.00035</b> | 0.80294                       | 0.79512 | 0.54429        | 5/0.5                         | <b>0.00003</b> | 0.61931 | <b>0.00053</b> |
| 10/1                           | <b>0.00471</b> | <b>0.00151</b> | 0.58050        | <b>0.00990</b>                | 0.72283 | <b>0.00262</b> | 10/1                          | <b>0.00013</b> | 0.84124 | <b>0.00014</b> |

E...encorafenib; V...vemurafenib; D...dabrafenib; B...binimetinib; C...cobimetinib; T...trametinib; bold numbers indicate significant values with p<0.05 as determined by two-tailed non-paired T-test.

**Table S4:** Comparison of IC<sub>50</sub> values for single and combined inhibitor treatment.

| <b>Malme3M (BRAF<sup>mut</sup>)</b> |                     |                    |                    |                   |
|-------------------------------------|---------------------|--------------------|--------------------|-------------------|
| <b>IC<sub>50</sub> (μM)</b>         | <b>Single BRAFi</b> | <b>Binimetinib</b> | <b>Cobimetinib</b> | <b>Trametinib</b> |
| <b>Single MEKi</b>                  |                     | 2.12400            | 0.08621            | 0.00922           |
| <b>Encorafenib</b>                  | 0.0841              | 0.0537<br>0.00537  | 0.0194<br>0.00194  | 0.0107<br>0.00107 |
| <b>Vemurafenib</b>                  | 3.0400              | 1.0780<br>0.10780  | 0.1684<br>0.01684  | 0.0620<br>0.00620 |
| <b>Dabrafenib</b>                   | 0.3286              | 0.1294<br>0.01294  | 0.0227<br>0.00227  | 0.0119<br>0.00119 |
| <b>WM3734 (BRAF<sup>mut</sup>)</b>  |                     |                    |                    |                   |
| <b>IC<sub>50</sub> (μM)</b>         | <b>Single BRAFi</b> | <b>Binimetinib</b> | <b>Cobimetinib</b> | <b>Trametinib</b> |
| <b>Single MEKi</b>                  |                     | 3.75800            | 0.48130            | 0.10690           |
| <b>Encorafenib</b>                  | 0.0466              | 0.0356<br>0.00356  | 0.0247<br>0.00247  | 0.0143<br>0.00143 |
| <b>Vemurafenib</b>                  | 2.6450              | 0.8345<br>0.08345  | 0.2885<br>0.02885  | 0.3022<br>0.03022 |
| <b>Dabrafenib</b>                   | 0.0546              | 0.0458<br>0.00458  | 0.0271<br>0.00271  | 0.0145<br>0.00145 |
| <b>WM1366 (NRAS<sup>mut</sup>)</b>  |                     |                    |                    |                   |
| <b>IC<sub>50</sub> (μM)</b>         | <b>Single BRAFi</b> | <b>Binimetinib</b> | <b>Cobimetinib</b> | <b>Trametinib</b> |
| <b>Single MEKi</b>                  |                     | NC                 | 12.08000           | 4.41400           |
| <b>Encorafenib</b>                  | NC                  | 1.9830<br>0.19830  | 0.5985<br>0.05985  | 0.4139<br>0.04139 |
| <b>Vemurafenib</b>                  | NC                  | NC<br>NC           | 6.9750<br>0.69750  | 4.6110<br>0.46110 |
| <b>Dabrafenib</b>                   | NC                  | 4.6610<br>0.46610  | 0.6812<br>0.06812  | 0.4631<br>0.04631 |

IC<sub>50</sub>...half maximum inhibitory concentration, NC...not converged

**Table S5:** List of p-values from MUH proliferation data, related to Figure S2.

| Malme3M (BRAF <sup>mut</sup> ) |                |                |                |                |                |                |                |                |                |
|--------------------------------|----------------|----------------|----------------|----------------|----------------|----------------|----------------|----------------|----------------|
| BRAFi/MEKi<br>[μM]             | EB/VB          | EB/DB          | VB/DB          | EC/VC          | EC/DC          | VC/DC          | ET/VT          | ET/DT          | VT/DT          |
| 0.0003/0.00003                 | 0.23484        | 0.18011        | 0.69762        | <b>0.04834</b> | 0.10860        | 0.38831        | 0.34917        | 0.90818        | 0.32922        |
| 0.0024/0.00024                 | <b>0.01038</b> | 0.06477        | <b>0.02239</b> | <b>0.00090</b> | 0.42776        | <b>0.00739</b> | 0.36330        | 0.92152        | 0.44996        |
| 0.019/0.0019                   | <b>0.00170</b> | 0.31932        | <b>0.00197</b> | <b>0.01879</b> | 0.93199        | 0.06008        | 0.48216        | 0.90218        | 0.57006        |
| 0.156/0.0156                   | <b>0.00768</b> | 0.40761        | <b>0.01865</b> | 0.18787        | 0.90605        | 0.27080        | 0.31847        | 0.82795        | 0.51007        |
| 1.25/0.125                     | <b>0.01406</b> | 0.06191        | <b>0.04905</b> | <b>0.00614</b> | 0.14929        | <b>0.02160</b> | <b>0.00876</b> | 0.23519        | 0.05049        |
| 10/1                           | <b>0.00227</b> | ND             | ND             | <b>0.00405</b> | ND             | ND             | <b>0.00251</b> | ND             | ND             |
| WM3734 (BRAF <sup>mut</sup> )  |                |                |                |                |                |                |                |                |                |
| BRAFi/MEKi<br>[μM]             | EB/VB          | EB/DB          | VB/DB          | EC/VC          | EC/DC          | VC/DC          | ET/VT          | ET/DT          | VT/DT          |
| 0.0003/0.00003                 | 0.70308        | 0.26181        | 0.08809        | 0.94424        | 0.18218        | 0.20030        | 0.88113        | 0.57058        | 0.35288        |
| 0.0024/0.00024                 | 0.11532        | 0.09949        | 0.74236        | <b>0.01767</b> | 0.19744        | 0.15623        | 0.11083        | 0.74191        | 0.24507        |
| 0.019/0.0019                   | <b>0.00066</b> | 0.23365        | <b>0.00093</b> | <b>0.00029</b> | 0.55804        | <b>0.00075</b> | <b>0.04004</b> | 0.86969        | <b>0.02539</b> |
| 0.156/0.0156                   | <b>0.00022</b> | 0.67198        | <b>0.00005</b> | 0.07104        | 0.60394        | <b>0.02388</b> | 0.25891        | 0.72112        | 0.17495        |
| 1.25/0.125                     | <b>0.00445</b> | 0.77767        | <b>0.00189</b> | <b>0.00056</b> | 0.73079        | <b>0.00024</b> | <b>0.00318</b> | 0.68895        | <b>0.00343</b> |
| 10/1                           | <b>0.03813</b> | ND             | ND             | <b>0.03774</b> | ND             | ND             | <b>0.04398</b> | ND             | ND             |
| WM1366 (NRAS <sup>mut</sup> )  |                |                |                |                |                |                |                |                |                |
| BRAFi/MEKi<br>[μM]             | EB/VB          | EB/DB          | VB/DB          | EC/VC          | EC/DC          | VC/DC          | ET/VT          | ET/DT          | VT/DT          |
| 0.3125/0.03125                 | 0.27420        | 0.56233        | 0.28905        | 0.05770        | 0.19300        | 0.45232        | <b>0.01494</b> | 0.12138        | 0.13772        |
| 0.625/0.0625                   | 0.55579        | 0.92364        | 0.41584        | <b>0.00342</b> | 0.53766        | 0.05522        | <b>0.00001</b> | 0.94300        | <b>0.00007</b> |
| 1.25/0.125                     | <b>0.00903</b> | <b>0.03923</b> | 0.12049        | <b>0.00001</b> | <b>0.04340</b> | <b>0.00001</b> | <b>0.00000</b> | 0.24061        | <b>0.00000</b> |
| 2.5/0.25                       | <b>0.00009</b> | <b>0.00397</b> | <b>0.00442</b> | <b>0.00003</b> | <b>0.02914</b> | <b>0.00007</b> | <b>0.00000</b> | <b>0.00639</b> | <b>0.00003</b> |
| 5/0.5                          | <b>0.00000</b> | <b>0.00340</b> | <b>0.00094</b> | <b>0.00001</b> | <b>0.00713</b> | <b>0.00315</b> | <b>0.00012</b> | <b>0.00219</b> | 0.69943        |
| 10/1                           | <b>0.00000</b> | ND             | ND             | 0.06481        | ND             | ND             | 0.69309        | ND             | ND             |

E...encorafenib; V...vemurafenib; D...dabrafenib; B...binimetinib; C...cobimetinib; T...trametinib; ND...not determined; bold numbers indicate significant values with p<0.05 as determined by two-tailed non-paired T-test.

**Table S6:** List of p-values from MUH proliferation data, related to Figure S3.

| Malme3M (BRAF <sup>mut</sup> ) |                |                |                |                |                |                |                |                |                |
|--------------------------------|----------------|----------------|----------------|----------------|----------------|----------------|----------------|----------------|----------------|
| BRAFi/MEKi<br>[μM]             | EB/EC          | EB/ET          | EC/ET          | VB/VC          | VB/VT          | VC/VT          | DB/DC          | DB/DT          | DC/DT          |
| 0.0003/0.00003                 | 0.29511        | <b>0.01589</b> | <b>0.02120</b> | 0.95532        | <b>0.00324</b> | <b>0.00272</b> | 0.36441        | <b>0.01017</b> | <b>0.01504</b> |
| 0.0024/0.00024                 | 0.23360        | 0.10863        | 0.28399        | 0.94449        | <b>0.00436</b> | <b>0.00060</b> | 0.16801        | 0.08452        | 0.23952        |
| 0.019/0.0019                   | 0.24524        | 0.28623        | 0.90821        | <b>0.00289</b> | <b>0.01144</b> | 0.15881        | 0.15961        | 0.16493        | 0.92187        |
| 0.156/0.0156                   | 0.14502        | 0.13535        | 0.71754        | <b>0.01269</b> | <b>0.01847</b> | 0.73149        | 0.11439        | 0.18000        | 0.89552        |
| 1.25/0.125                     | 0.19667        | 0.26341        | 0.63154        | 0.12361        | 0.12402        | 0.97069        | <b>0.01111</b> | <b>0.03714</b> | 0.76095        |
| 10/1                           | 0.91088        | 0.08211        | 0.05383        | 0.60273        | 0.91426        | 0.66938        | ND             | ND             | ND             |
| WM3734 (BRAF <sup>mut</sup> )  |                |                |                |                |                |                |                |                |                |
| BRAFi/MEKi<br>[μM]             | EB/EC          | EB/ET          | EC/ET          | VB/VC          | VB/VT          | VC/VT          | DB/DC          | DB/DT          | DC/DT          |
| 0.0003/0.00003                 | 0.55416        | 0.93331        | 0.66520        | 0.35930        | 0.64264        | 0.77152        | 0.25710        | <b>0.04641</b> | <b>0.03625</b> |
| 0.0024/0.00024                 | 0.29233        | 0.08428        | 0.18482        | 0.63917        | 0.14101        | 0.05638        | 0.33315        | 0.09244        | 0.17180        |
| 0.019/0.0019                   | 0.57584        | 0.28861        | 0.52877        | 0.10934        | <b>0.01454</b> | 0.03417        | 0.20502        | <b>0.02109</b> | 0.18266        |
| 0.156/0.0156                   | 0.80420        | 0.80173        | 0.97327        | <b>0.00077</b> | <b>0.00331</b> | 0.76684        | 0.82688        | 0.81828        | 0.92817        |
| 1.25/0.125                     | 0.93005        | 0.92718        | 0.99647        | 0.92636        | 0.62501        | 0.60976        | 0.85754        | 0.82579        | 0.93268        |
| 10/1                           | 0.69534        | 0.11824        | 0.27196        | 0.46664        | 0.44221        | 0.11655        | ND             | ND             | ND             |
| WM1366 (NRAS <sup>mut</sup> )  |                |                |                |                |                |                |                |                |                |
| BRAFi/MEKi<br>[μM]             | EB/EC          | EB/ET          | EC/ET          | VB/VC          | VB/VT          | VC/VT          | DB/DC          | DB/DT          | DC/DT          |
| 0.3125/0.03125                 | <b>0.02483</b> | <b>0.00383</b> | 0.05993        | 0.89550        | <b>0.00929</b> | 0.06674        | 0.22332        | <b>0.01353</b> | 0.09701        |
| 0.625/0.0625                   | <b>0.00536</b> | <b>0.00024</b> | <b>0.03684</b> | 0.28948        | <b>0.02607</b> | <b>0.04390</b> | <b>0.04536</b> | <b>0.00005</b> | 0.07769        |
| 1.25/0.125                     | <b>0.00005</b> | <b>0.00003</b> | 0.90252        | 0.13312        | <b>0.01192</b> | 0.06563        | <b>0.00001</b> | <b>0.00002</b> | 0.19692        |
| 2.5/0.25                       | <b>0.00146</b> | <b>0.00084</b> | 0.65062        | <b>0.04903</b> | <b>0.00069</b> | <b>0.01513</b> | <b>0.00056</b> | <b>0.00050</b> | 0.91116        |
| 5/0.5                          | 0.08528        | 0.10404        | 0.74835        | <b>0.00015</b> | <b>0.00001</b> | <b>0.00011</b> | 0.18918        | 0.26927        | 0.65211        |
| 10/1                           | 0.75555        | 0.92560        | 0.86538        | <b>0.00000</b> | <b>0.00000</b> | <b>0.01922</b> | ND             | ND             | ND             |

E...encorafenib; V...vemurafenib; D...dabrafenib; B...binimetinib; C...cobimetinib; T...trametinib; ND...not determined; bold numbers indicate significant values with p<0.05 as determined by two-tailed non-paired T-test.
